## COMMENTS AND RESPONSES

### **Comment on: Olsson et al. High Levels of Education Are Associated With an Increased Risk of Latent Autoimmune Diabetes in Adults: Results From the Nord-Trøndelag Health Study. Diabetes Care 2011;34:102-107**

**O**lsson et al. (1) describe an association between high levels of education and an increased risk of autoimmune diabetes in adults. They propose “the hygiene hypothesis” as an explanation for their results indicating that childhood environment and a low prevalence of childhood infections might contribute to the evolution of autoimmune diabetes. We would like to draw the attention to an alternative explanation of the results, and we wonder whether additional data

available from the HUNT (Nord-Trøndelag Health Study) surveys might further clarify these phenomena.

Children of parents with a higher level of education are more likely to have a higher level of education themselves (2). Patients with type 1 diabetes and a higher educational social status tend to have a better metabolic control and consequently a higher conception rate and better pregnancy outcomes when compared with patients with type 1 diabetes and a lower level of education and social status (3–5). Hence, we hypothesize that parents with type 1 diabetes/latent autoimmune diabetes in adults and a higher educational level might have had a higher probability of passing the autoimmune predisposition to type 1 diabetes to their offspring compared with parents with lower levels of education. Olsson et al. seem to have adjusted the results to family history of diabetes, but apparently without differentiating between type 1 and type 2 diabetes (1). We wonder whether the data of the HUNT survey would allow such a differentiation between the types of parental diabetes and if the level of education was assessed in parents.

PETER T. SAWICKI, MD, PHD<sup>1</sup>  
HILDA BASTIAN<sup>2</sup>

From the <sup>1</sup>Institute of Health Economics and Clinical Epidemiology, University of Cologne, Cologne, Germany; and the <sup>2</sup>Department of Patient Information, Institute for Quality and Efficiency in Health Care, Cologne, Germany.

Corresponding author: Peter T. Sawicki, peter.sawicki@t-online.de.

DOI: 10.2337/dc11-0188

© 2011 by the American Diabetes Association.

Readers may use this article as long as the work is properly cited, the use is educational and not for profit, and the work is not altered. See <http://creativecommons.org/licenses/by-nc-nd/3.0/> for details.

**Acknowledgments**—No potential conflicts of interest relevant to this article were reported.

#### References

1. Olsson L, Ahlbom A, Grill V, Midthjell K, Carlsson S. High levels of education are associated with an increased risk of latent autoimmune diabetes in adults: results from the Nord-Trøndelag Health Study. *Diabetes Care* 2011;34:102–107
2. Hoover-Dempsey KV, Sandler HM. Why do parents become involved in their children's education? *Rev Educ Res* 1997;67:3–42
3. Mühlhauser I, Overmann H, Bender R, et al. Social status and the quality of care for adult people with type 1 (insulin-dependent) diabetes mellitus—a population-based study. *Diabetologia* 1998;41:1139–1150
4. Leguizamón G, Igarzabal ML, Reece EA. Periconceptional care of women with diabetes mellitus. *Obstet Gynecol Clin North Am* 2007;34:225–239, viii
5. Kitzmiller JL, Buchanan TA, Kjos S, Combs CA, Ratner RE. Pre-conception care of diabetes, congenital malformations, and spontaneous abortions. *Diabetes Care* 1996;19:514–541
